# Supplementary material for: Bildungsunterschiede von Anfang an?
Source: Atypon-hosted journal article supplement (doi:10.1026/2191-9186/a000405), 2019-01-01
Supplement: 2191-9186_a000405_esm1.pdf [file 2191-9186_a000405_esm1.pdf]

## Elektronisches Supplement 1

---

### Tierquiz

Dies ist ein junger Vogel.

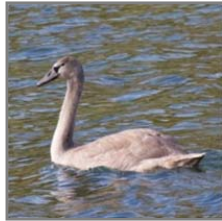

Welcher der folgenden Vögel könnte seine Mutter sein?

Nur eine Antwort ist richtig. Welcher der folgenden Vögel könnte seine Mutter sein?

*(Bilderstreifen für die Kinder: Kind darf auf eines der Bilder zeigen)*

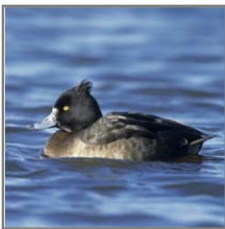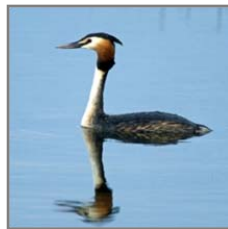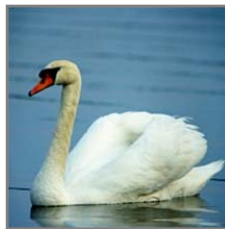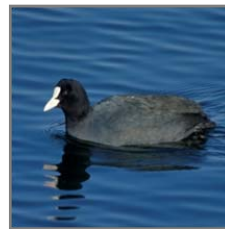

---

*Abbildung 1.* Beispiel für ein Kindergarten-Item (Kontext: Umwelt; inhaltsbezogene Komponente: Entwicklung, vgl. Hahn et al., 2013a)

## SAFT ABFÜLLEN

Paul und Lena haben Durst. Sie möchten gern ein Glas Saft. Ihre Erzieherin schenkt jedem von beiden ein Glas Saft ein. „Lena bekommt immer mehr Saft als ich!“, sagt Paul, Wie können Paul und Lena prüfen, ob sie gleich viel Saft bekommen haben?

*(Bilderstreifen für die Kinder: Kind darf auf eines der Bilder zeigen)*

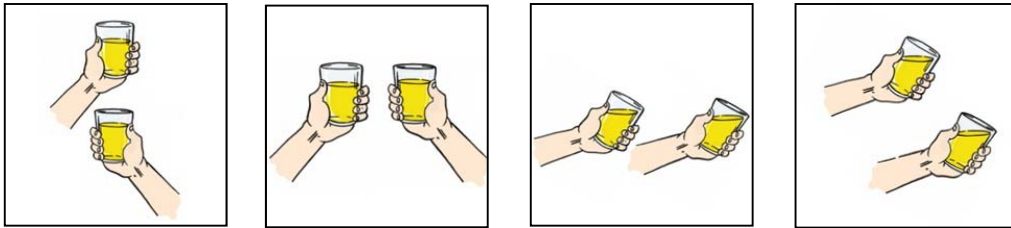

|                                                                                     |                                                              |
|-------------------------------------------------------------------------------------|--------------------------------------------------------------|
|   | <p>A: Sie müssen die Gläser übereinander halten.</p>         |
|  | <p>B: Sie müssen die Gläser nebeneinander halten.</p>        |
|  | <p>C: Sie müssen die Gläser schräg nebeneinander halten.</p> |
|  | <p>D: Sie müssen die Gläser schräg übereinander halten.</p>  |

Nur eine Antwort ist richtig! Wie können Paul und Lena prüfen, ob sie gleich viel Saft bekommen haben?

*Abbildung 2.* Beispiel für ein Kindergarten-Item (Kontext: Technologie; prozessbezogene Komponente: naturwissenschaftliche Denk- und Arbeitsweisen, vgl. Hahn et al., 2013b)

## Literatur

Hahn, I., Schöps, K., Rönnebeck, S., Martensen, M., Hansen, S., Saß, S. et al. (2013a). Assessing scientific literacy over the lifespan – A description of the NEPS science framework and the test development. *Journal for Educational Research Online*, 5 (2), 110 – 138.

Hahn, I., Schöps, K., Saß, S., Hansen, S., Martensen, M., Wagner, H., & Funke, L. (2013b). The assessment of scientific literacy in the National Educational Panel Study (NEPS) including example items for Kindergarten, grade 6, students and adults. *Scientific Use File 2013, Version 1.0.0*. Bamberg: Leibniz Institute for Educational Trajectories, National Educational Panel Study.
